# Supplementary material for: Long-term air concentrations, wet deposition, and scavenging ratios of inorganic ions, HNO 3 , and SO 2 and assessment of aerosol and precipitation acidity at Canadian rural locations
Source: Copernicus journal article supplement (doi:10.5194/acp-17-4711-2017), 2017-04-11
Supplement: Supplementary file 1 [file acp-17-4711-2017-supplement.pdf]

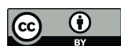

*Supplement of*

**Long-term air concentrations, wet deposition, and scavenging ratios of inorganic ions,  $\text{HNO}_3$ , and  $\text{SO}_2$  and assessment of aerosol and precipitation acidity at Canadian rural locations**

**Irene Cheng and Leiming Zhang**

*Correspondence to:* Irene Cheng ([irene.cheng@canada.ca](mailto:irene.cheng@canada.ca)) and Leiming Zhang ([leiming.zhang@canada.ca](mailto:leiming.zhang@canada.ca))

The copyright of individual parts of the supplement might differ from the CC-BY 3.0 licence.

## Section S1: Correlation analysis between particulate ions and meteorological variables

The influence of meteorological parameters including temperature, relative humidity and precipitation rates on the temporal trends of particulate ions and trace gases were also investigated by performing correlation analyses on the monthly averaged data. The descending trend in  $K^+$  between 1993 and 2010 at the majority of the sites was not strongly influenced by precipitation as evident by the weak correlation coefficients (Table S1). Higher correlation between monthly average  $K^+$  and temperature were found at Sprucedale, Frelighsburg and Lac Edouard ( $r = 0.52-0.69$ ,  $p < 0.05$ ). At these sites, the monthly average  $K^+$  peaked in March-April and was at the minimum concentration during December-January, which resembled the seasonal temperature cycle (Fig. S2a). The higher  $K^+$  in the early spring could be attributed to increase soil emissions from agriculture operations and forest fires during springtime since the major sources of particulate  $K^+$  are from biomass and soil. Decreasing  $NH_4^+$  observed at most of the sites was only weakly correlated with monthly precipitation rates and relative humidity, implying these meteorological parameters had little influence on the long-term temporal trend. Higher correlation between monthly average  $NH_4^+$  and temperature was found at Kejimikujik ( $r = 0.63$ ,  $p < 0.05$ ). The maximum  $NH_4^+$  typically occurred during April-May and reached its lowest concentration during December-January (Fig. S2b). This seasonal trend is linked to the formation of  $SO_4^{2-}$  through  $SO_2$  oxidation, which tends to occur at higher temperatures because of increase production of atmospheric oxidants. This theory is consistent with the very high correlation between monthly average  $NH_4^+$  and  $SO_4^{2-}$  ( $r = 0.91$ ,  $p < 0.05$ ) at Kejimikujik. Overall, strong correlations between  $NH_4^+$  and  $SO_4^{2-}$  were observed at all the sites ( $r = 0.6-0.94$ ,  $p < 0.05$ ). The high correlation between  $SO_4^{2-}/SO_2$  ratio and temperature ( $r = 0.61-0.84$ ,  $p < 0.05$ ) suggests  $SO_4^{2-}$  formation from the gas-phase oxidation of  $SO_2$  (Yao et al., 2002). Besides the relationship between  $NH_4^+$  and  $SO_4^{2-}$ , three of the sites including Saturna, ELA and Egbert exhibited strong correlations between  $NH_4^+$  and  $NO_3^-$  ( $r = 0.52-0.7$ ,  $p < 0.05$ ) indicating that  $NH_4^+$  also followed the temporal trend of  $NO_3^-$  at some locations. In summary, precipitation and relative humidity had little impact on the long-term temporal patterns of particulate ions. Seasonal temperature trends are linked with the seasonal cycle of atmospheric oxidants which explains the short-term patterns in  $SO_4^{2-}$  and  $NH_4^+$ . However, the correlation analysis using monthly data did not find a strong relationship between long-term temperature changes and long-term trends in  $SO_4^{2-}$  and  $NH_4^+$  concentrations. The lack of trends is related to the combined effects of increasing temperature and decreasing sulfur dioxide emissions. Studies suggest an increase in temperature would increase ammonia emissions and the partitioning of ammonium nitrate to ammonia (Sutton et al., 2013; Yao and Zhang, 2016). However, the decreasing trend in sulfur dioxide emissions would likely reduce atmospheric sulfate and subsequently lead to lower ammonium sulfate production (Yao and Zhang, 2016).

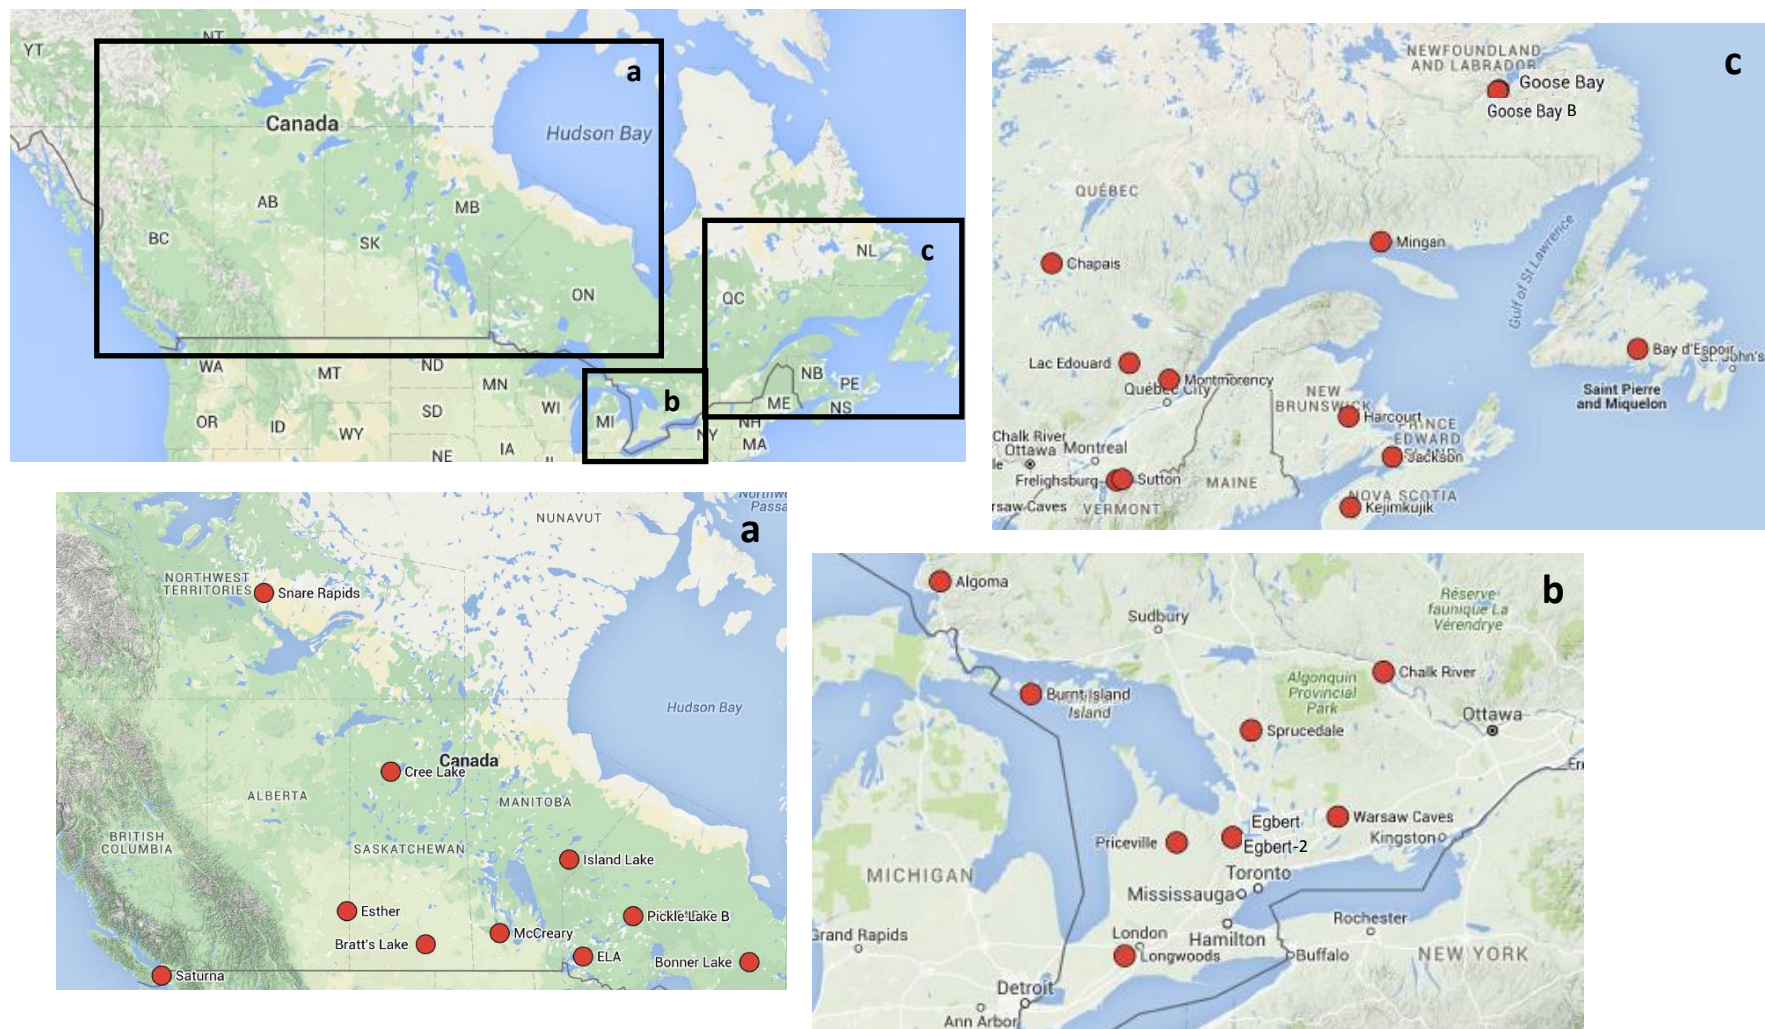

**Figure S1: Map of 31 CAPMoN sites in western/central Canada (a), southern Ontario (b), and Quebec and eastern Canada (c).**

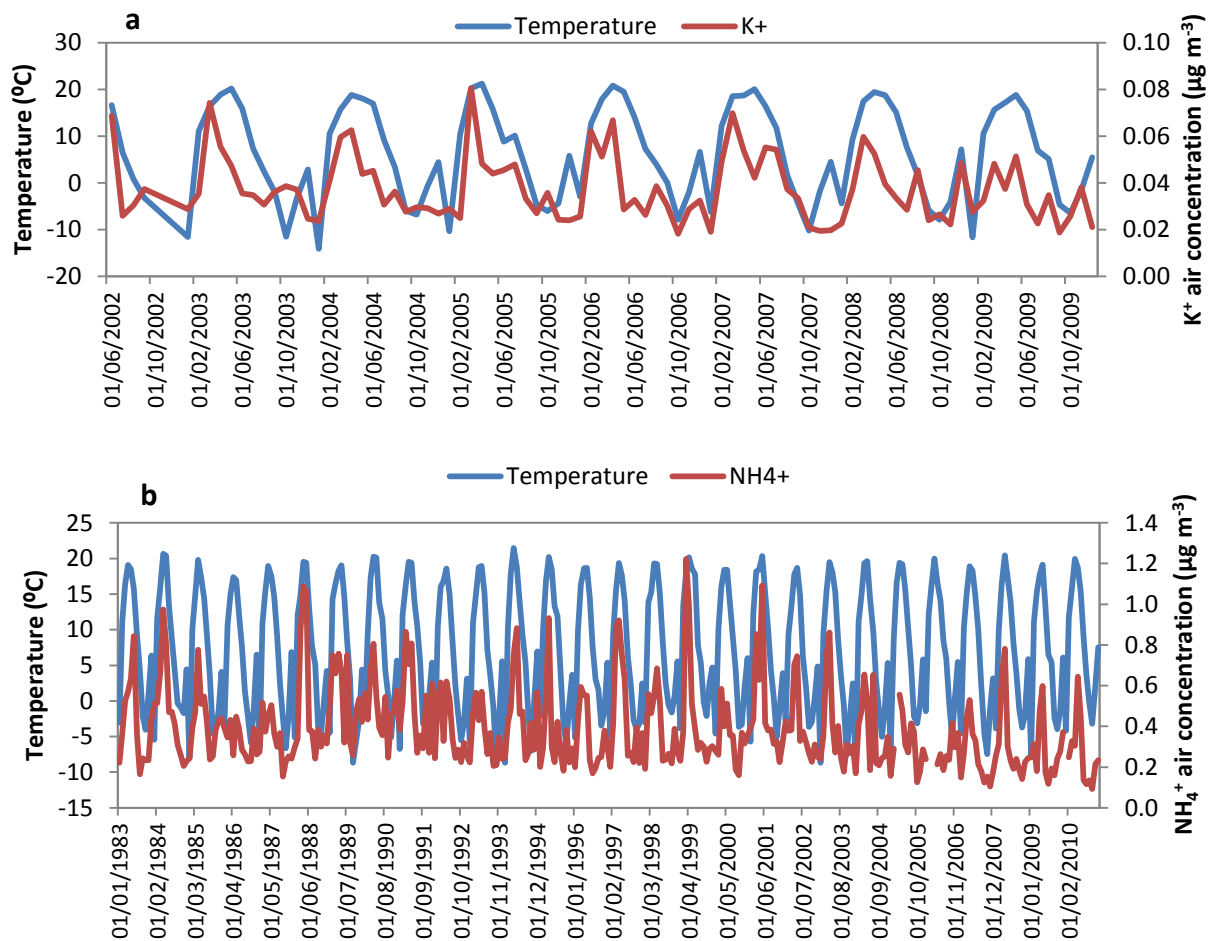

**Figure S2: Time-series plots of monthly average air temperature and atmospheric  $K^+$  from Sprucedale, Frelighsburg and Lac Edouard (combined) (a) and monthly average air temperature and atmospheric  $NH_4^+$  at Kejimikujik (b).**

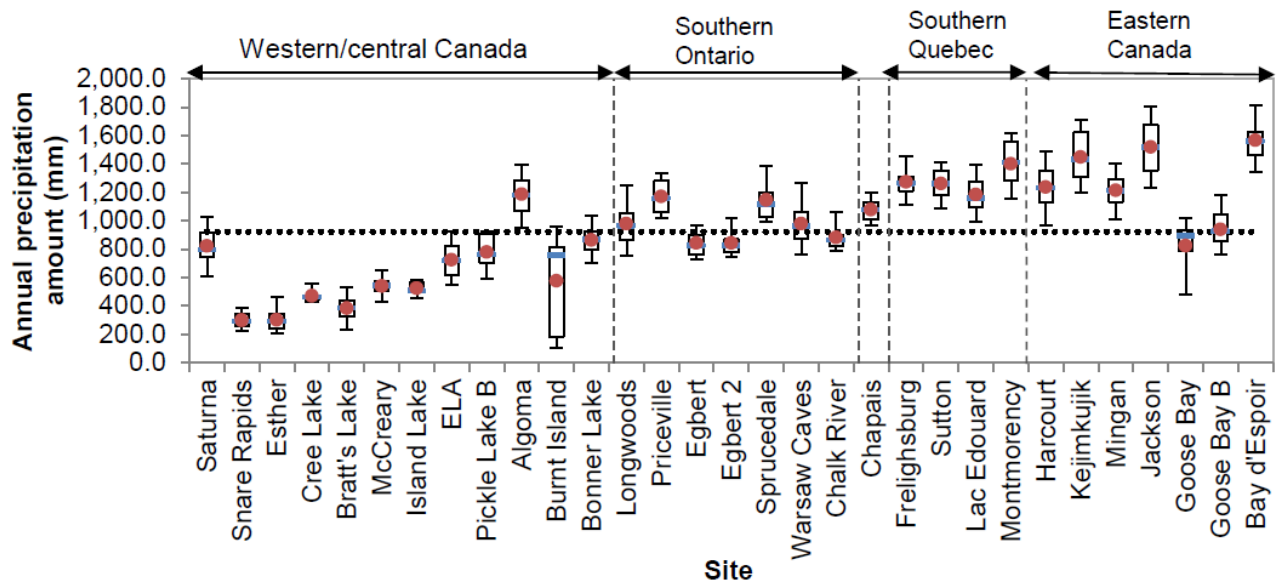

Figure S3: Geographical pattern of the annual precipitation amount. The blue line indicates the median; the red dot indicates the mean; the box and whiskers include the interquartile range and the 5<sup>th</sup> to 95<sup>th</sup> percentile range, respectively; the dotted line is the overall median among the sites.

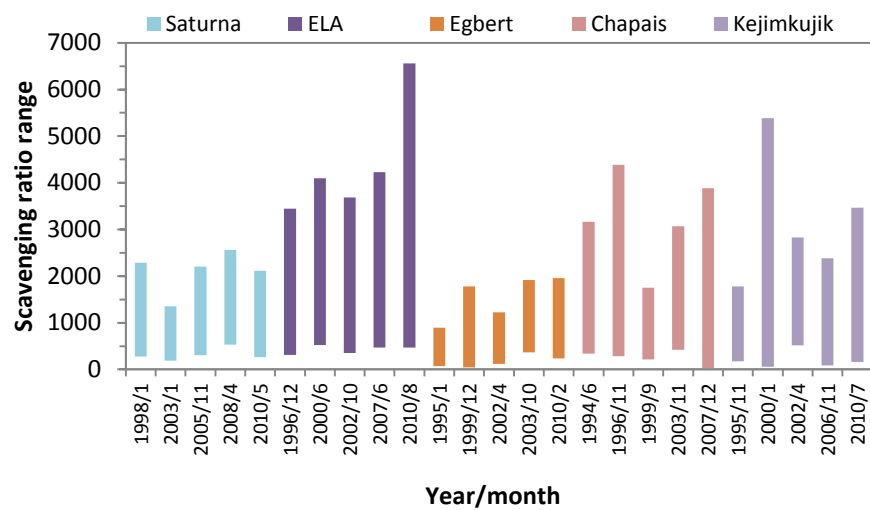

**Figure S4: Variability in scavenging ratios among different inorganic ions and trace gases within the same month for five different years at five of the sites.**

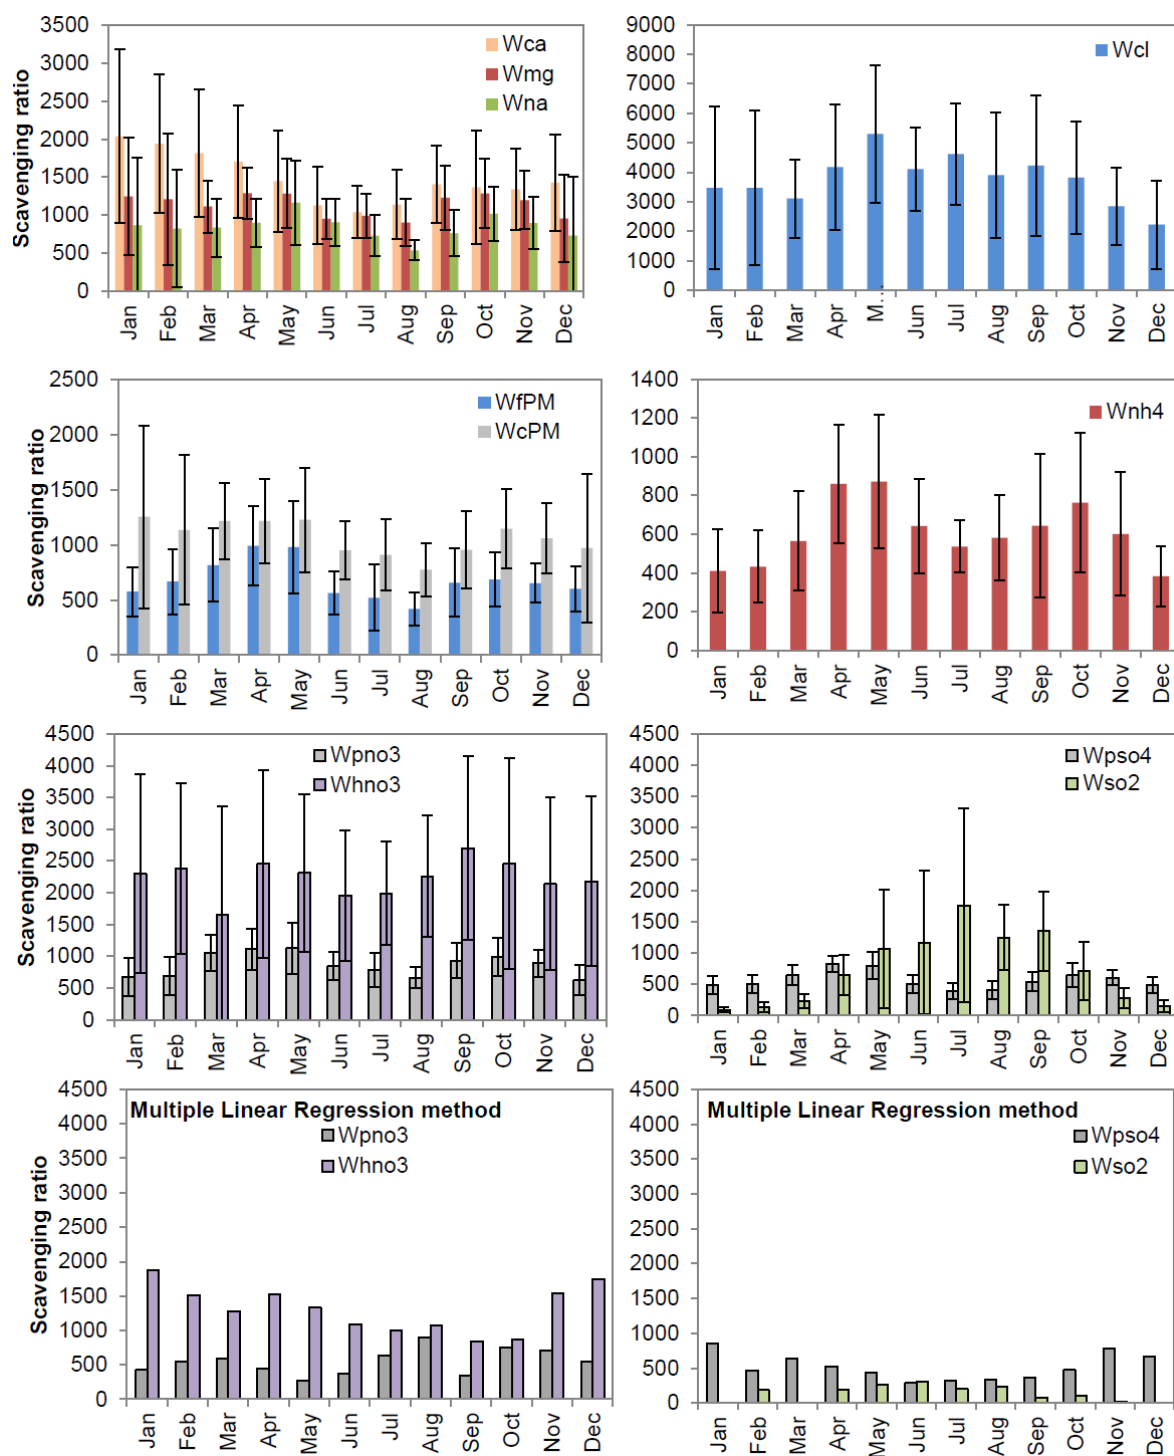

**Figure S5: Monthly variation in scavenging ratios among 13 sites. Error bars represent the standard deviation of scavenging ratios between sites.  $W_{fPM}$  and  $W_{cPM}$  are the fine and coarse particle scavenging ratios, respectively.**

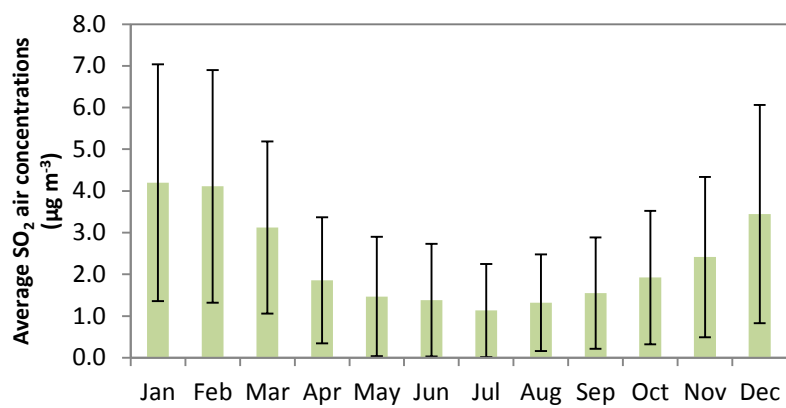

**Figure S6. Monthly variation in SO<sub>2</sub> air concentrations. Error bars represent the standard deviation between sites.**

Table S1: Pearson correlation coefficients between selected ions and meteorological parameters (significant at  $p < 0.05$ ; otherwise non-significant (ns)). Note that the ion concentrations and meteorological parameters are monthly averages.

|              | $K^+$              |                      |                     |  | $NH_4^+$            |                    |                     |                    |             | $SO_4^{2-}/SO_2$ |
|--------------|--------------------|----------------------|---------------------|--|---------------------|--------------------|---------------------|--------------------|-------------|------------------|
| Site         | Temp               | RH                   | Precip              |  | Temp                | RH                 | Precip              | $NO_3^-$           | $SO_4^{2-}$ | Temp             |
| Saturna      | -0.20              | 0.18                 | 0.18                |  | -0.04 <sup>ns</sup> | -0.23              | -0.17               | 0.67               | 0.60        | 0.61             |
| Bratt's Lake | 0.09 <sup>ns</sup> | -0.20                | -0.25               |  |                     |                    |                     |                    |             |                  |
| ELA          | 0.20               | -0.03 <sup>ns</sup>  | 0.12                |  | -0.26               | 0.13               | -0.22               | 0.70               | 0.78        | 0.75             |
| Algoma       | 0.42               | -0.07 <sup>ns</sup>  | -0.04 <sup>ns</sup> |  | 0.36                | 0.10               | -0.17               | 0.23               | 0.87        | 0.73             |
| Longwoods    |                    |                      |                     |  | -0.05 <sup>ns</sup> | 0.20               | -0.06 <sup>ns</sup> | 0.44               | 0.68        | 0.81             |
| Egbert       |                    |                      |                     |  | -0.07 <sup>ns</sup> | 0.03 <sup>ns</sup> | -0.21               | 0.52               | 0.75        | 0.77             |
| Sprucedale   | 0.69               | 0.05 <sup>ns</sup>   | -0.14 <sup>ns</sup> |  | 0.30                | 0.06 <sup>ns</sup> | -0.23               | 0.20 <sup>ns</sup> | 0.92        | 0.73             |
| Chalk River  | 0.31               | -0.005 <sup>ns</sup> | 0.05 <sup>ns</sup>  |  | 0.37                | 0.09               | 0.02 <sup>ns</sup>  | 0.10 <sup>ns</sup> | 0.85        | 0.64             |
| Chapais      | 0.41               | -0.17                | 0.18                |  | 0.38                | -0.21              | 0.04 <sup>ns</sup>  | 0.23               | 0.85        | 0.77             |
| Frelighsburg | 0.53               | 0.08 <sup>ns</sup>   | 0.13 <sup>ns</sup>  |  | 0.11 <sup>ns</sup>  | 0.13 <sup>ns</sup> | -0.13 <sup>ns</sup> | 0.36               | 0.86        | 0.84             |
| Lac Edouard  | 0.52               | -0.15 <sup>ns</sup>  | 0.21                |  | 0.34                | 0.01 <sup>ns</sup> | 0.11 <sup>ns</sup>  | 0.23               | 0.94        | 0.76             |
| Kejimkujik   | 0.31               | -0.17                | -0.15               |  | 0.63                | -0.30              | -0.32               | -0.16              | 0.91        | 0.83             |

Table S2: Average cation and anion concentrations (neq m<sup>-3</sup>) in particulate matter by site and year

| Site         | Cation | Anion |  | Year | Cation | Anion |
|--------------|--------|-------|--|------|--------|-------|
| Saturna      | 0.047  | 0.045 |  | 1994 | 0.074  | 0.066 |
| Esther       | 0.052  | 0.033 |  | 1995 | 0.071  | 0.063 |
| Bratt's Lake | 0.060  | 0.031 |  | 1996 | 0.073  | 0.063 |
| ELA          | 0.024  | 0.024 |  | 1997 | 0.073  | 0.063 |
| Algoma       | 0.024  | 0.028 |  | 1998 | 0.076  | 0.064 |
| Longwoods    | 0.133  | 0.108 |  | 1999 | 0.075  | 0.066 |
| Egbert       | 0.096  | 0.072 |  | 2000 | 0.067  | 0.062 |
| Sprucedale   | 0.024  | 0.024 |  | 2001 | 0.078  | 0.068 |
| Chalk River  | 0.028  | 0.034 |  | 2002 | 0.073  | 0.061 |
| Chapais      | 0.016  | 0.019 |  | 2003 | 0.065  | 0.055 |
| Frelighsburg | 0.060  | 0.043 |  | 2004 | 0.063  | 0.054 |
| Sutton       | 0.062  | 0.054 |  | 2005 | 0.069  | 0.059 |
| Lac Edouard  | 0.016  | 0.018 |  | 2006 | 0.058  | 0.046 |
| Montmorency  | 0.023  | 0.026 |  | 2007 | 0.058  | 0.048 |
| Kejimikujik  | 0.035  | 0.041 |  | 2008 | 0.060  | 0.048 |
|              |        |       |  | 2009 | 0.052  | 0.041 |
|              |        |       |  | 2010 | 0.048  | 0.037 |

Table S3: Scavenging ratio (W) statistics from this study (mass basis). na indicates no available data. “C” indicates coastal locations.

| Site                     | W <sub>Ca2+</sub> | W <sub>Mg2+</sub> | W <sub>Na+</sub> | W <sub>coarsePM</sub> | W <sub>finePM =<br/>W<sub>k</sub></sub> | W <sub>Cl</sub> | W <sub>NH4</sub> | W <sub>pNO3</sub> | W <sub>HNO3</sub> | W <sub>pSO4</sub> | W <sub>SO2</sub> |
|--------------------------|-------------------|-------------------|------------------|-----------------------|-----------------------------------------|-----------------|------------------|-------------------|-------------------|-------------------|------------------|
| <b>Mean</b>              |                   |                   |                  |                       |                                         |                 |                  |                   |                   |                   |                  |
| Saturna <sup>C</sup>     | 1671              | 1493              | 1390             | 1505                  | 567                                     | 2103            | 445              | 897               | 776               | 602               | 233              |
| ELA                      | 1893              | 1347              | 1208             | 1496                  | 885                                     | 3519            | 848              | 1224              | 3079              | 696               | 1247             |
| Algoma                   | 2413              | 1510              | 1002             | 1426                  | 911                                     | 5779            | 762              | 1204              | 2064              | 734               | 330              |
| Longwoods                | 911               | 901               | 865              | 881                   | 996                                     | 2011            | 303              | 657               | 749               | 601               | 125              |
| Egbert                   | 625               | 748               | 713              | 697                   | 554                                     | 1914            | 283              | 583               | 982               | 473               | 181              |
| Sprucedale               | 1822              | 1299              | 905              | 1342                  | 611                                     | 4278            | 577              | 998               | 2012              | 611               | 445              |
| Chalk River              | na                | na                | 666              | 666                   | 580                                     | 5065            | 466              | 632               | 3005              | 547               | 560              |
| Chapais                  | 2077              | 899               | 475              | 1043                  | 758                                     | 1855            | 625              | 932               | 5527              | 661               | 1291             |
| Frelighsburg             | 852               | 838               | 647              | 781                   | 553                                     | 2554            | 411              | 642               | 1375              | 471               | 414              |
| Sutton                   | 1010              | 936               | 594              | 753                   | 497                                     | 4377            | 350              | 631               | 1616              | 473               | 396              |
| Lac Edouard              | 1702              | 1105              | 577              | 1128                  | 512                                     | 3192            | 465              | 842               | 2398              | 496               | 771              |
| Montmorency              | 1200              | 1148              | 599              | 742                   | 607                                     | 4969            | 406              | 697               | 2201              | 471               | 1222             |
| Kejimkujik <sup>C</sup>  | 1729              | 1980              | 2120             | 2077                  | 702                                     | 4959            | 303              | 1120              | 1842              | 571               | 1339             |
| Max avg/min<br>avg ratio | 3.9               | 2.6               | 4.5              | 3.1                   | 2.0                                     | 3.1             | 3.0              | 2.1               | 7.4               | 1.6               | 10.7             |
| <b>Median</b>            |                   |                   |                  |                       |                                         |                 |                  |                   |                   |                   |                  |
| Saturna <sup>C</sup>     | 1552              | 1404              | 1245             | 1430                  | 502                                     | 1934            | 416              | 796               | 650               | 533               | 208              |
| ELA                      | 1395              | 1141              | 993              | 1358                  | 765                                     | 3235            | 726              | 1151              | 2711              | 628               | 1141             |
| Algoma                   | 1946              | 1266              | 816              | 1272                  | 769                                     | 4532            | 655              | 1046              | 1880              | 698               | 203              |
| Longwoods                | 840               | 832               | 775              | 802                   | 682                                     | 1684            | 252              | 601               | 857               | 531               | 60               |
| Egbert                   | 535               | 693               | 585              | 635                   | 440                                     | 1355            | 245              | 521               | 829               | 428               | 127              |
| Sprucedale               | 1504              | 1238              | 765              | 1218                  | 556                                     | 3872            | 582              | 945               | 1906              | 582               | 204              |

|                                   |      |      |      |      |     |      |     |     |      |     |      |
|-----------------------------------|------|------|------|------|-----|------|-----|-----|------|-----|------|
| Chalk River                       | na   | na   | 531  | 531  | 437 | 4321 | 401 | 526 | 2568 | 449 | 284  |
| Chapais                           | 1743 | 712  | 363  | 883  | 640 | 1216 | 544 | 787 | 4914 | 578 | 828  |
| Frelighsburg                      | 774  | 754  | 540  | 742  | 438 | 1788 | 405 | 599 | 1322 | 442 | 251  |
| Sutton                            | 968  | 888  | 549  | 706  | 445 | 2972 | 314 | 562 | 1452 | 435 | 241  |
| Lac Edouard                       | 1483 | 1015 | 497  | 1023 | 450 | 2480 | 380 | 780 | 2077 | 404 | 453  |
| Montmorency                       | 1130 | 833  | 474  | 623  | 432 | 3633 | 347 | 559 | 2173 | 386 | 809  |
| Kejimikujik <sup>C</sup>          | 1482 | 1416 | 1447 | 1452 | 541 | 3511 | 279 | 926 | 1571 | 488 | 461  |
| Max<br>median/min<br>median ratio | 3.6  | 2.0  | 4.0  | 2.7  | 1.8 | 3.7  | 3.0 | 2.2 | 7.6  | 1.8 | 19.0 |
| <b>Standard deviation</b>         |      |      |      |      |     |      |     |     |      |     |      |
| Saturna <sup>C</sup>              | 798  | 727  | 734  | 655  | 271 | 1001 | 217 | 381 | 547  | 276 | 123  |
| ELA                               | 1684 | 810  | 1016 | 990  | 483 | 2159 | 476 | 680 | 1636 | 336 | 880  |
| Algoma                            | 1869 | 1061 | 661  | 973  | 653 | 5161 | 517 | 753 | 1017 | 284 | 372  |
| Longwoods                         | 439  | 398  | 362  | 312  | 869 | 1331 | 159 | 233 | 453  | 273 | 142  |
| Egbert                            | 373  | 317  | 427  | 322  | 501 | 1547 | 170 | 307 | 647  | 214 | 180  |
| Sprucedale                        | 1039 | 634  | 637  | 597  | 286 | 2940 | 253 | 504 | 840  | 259 | 523  |
| Chalk River                       | na   | na   | 450  | 450  | 417 | 3763 | 313 | 392 | 1629 | 352 | 681  |
| Chapais                           | 1273 | 668  | 349  | 641  | 407 | 1969 | 328 | 529 | 2654 | 339 | 1373 |
| Frelighsburg                      | 415  | 367  | 382  | 331  | 514 | 2288 | 157 | 311 | 523  | 170 | 438  |
| Sutton                            | 374  | 371  | 254  | 302  | 321 | 3320 | 155 | 284 | 618  | 234 | 445  |
| Lac Edouard                       | 1003 | 597  | 361  | 517  | 281 | 2188 | 257 | 412 | 1195 | 260 | 843  |
| Montmorency                       | 628  | 783  | 354  | 441  | 478 | 4489 | 231 | 425 | 960  | 324 | 1151 |
| Kejimikujik <sup>C</sup>          | 1134 | 1643 | 1942 | 1823 | 671 | 4723 | 154 | 687 | 1172 | 391 | 2245 |

Table S4: Scavenging ratios from literature (mass basis). \* Most literature values excluded gas scavenging except where indicated; <sup>1</sup>Derived from multiple linear regression; <sup>2</sup>W<sub>pNO<sub>3</sub></sub> based on sum of pNO<sub>3</sub><sup>-</sup> and HNO<sub>3</sub> in air; <sup>3</sup>W<sub>pSO<sub>4</sub></sub> based on sum of pSO<sub>4</sub><sup>2-</sup> and SO<sub>2</sub> in air; <sup>4</sup>Snow events only.

| Location                 | W <sub>Ca2+</sub> | W <sub>Mg2+</sub> | W <sub>Na+</sub> | W <sub>K+</sub> | W <sub>Cl</sub> | *W <sub>NH4</sub> | *W <sub>pNO3</sub> | *W <sub>pSO4</sub> | W <sub>HNO3</sub> | W <sub>SO2</sub> | Reference                               |
|--------------------------|-------------------|-------------------|------------------|-----------------|-----------------|-------------------|--------------------|--------------------|-------------------|------------------|-----------------------------------------|
| CAPMoN sites, Canada     | 625-2413          | 748-1980          | 475-2120         | 497-996         | 1855-5779       | 283-848           | 583-1224           | 471-734            | 749-5527          | 125-1339         | This study                              |
|                          |                   |                   |                  |                 |                 |                   | 523-1776           | 391-903            | 722-2848          | 31-409           | This study <sup>1</sup>                 |
| Eastern Canada           |                   |                   |                  |                 |                 |                   | 832-2950           | 831-1550           |                   |                  | Barrie et al. (1985) <sup>2</sup>       |
| NADP/CASTNET sites, U.S. | 860-2526          | 656-2011          | 798-7409         | 265-885         | 1430-22950      |                   |                    |                    |                   |                  | Cheng et al. (2015)                     |
| NADP/AIRMoN sites, U.S.  |                   |                   |                  |                 |                 | 96-3050           |                    | 216-2710           | 300-1700          |                  | Hicks (2005) <sup>3</sup>               |
| Northern Michigan        |                   |                   |                  | 80-4600         |                 | 40-2200           | 500                | 60-2280            | 3500-4550         | 219-355          | Cadle et al. (1990) <sup>4</sup>        |
| Barbados                 |                   |                   | 578-869          |                 |                 |                   | 336-409            | 264-315            |                   |                  | Galloway et al. (1993)                  |
| Bermuda                  |                   |                   | 560-749          |                 |                 |                   | 273-447            | 182-242            |                   |                  | Galloway et al. (1993)                  |
| Ireland                  |                   |                   | 1692-5800        |                 |                 |                   | 535-1258           | 321-734            |                   |                  | Galloway et al. (1993)                  |
| Vitoria, Spain           | 3983              |                   | 3625             | 1151            | 3030            | 1739              | 2303               | 2830               |                   |                  | Encinas et al. (2004)                   |
| Central France           |                   |                   |                  | 20000-250000    |                 | 500-8500          | 4500-16500         | 750-5250           |                   |                  | Bourcier et al. (2012)                  |
| Sardinia, Italy          | 3459-4605         | 1013-1524         | 1708-1815        | 1630-1845       | 2085-2419       |                   | 754-1062           | 1728-2173          |                   |                  | Guerzoni et al. (1995)                  |
| Turkey                   | 1649±466          |                   | 789±176          | 619±138         |                 | 624±147           | 612±228            | 1177±301           |                   |                  | Tuncel and Ungör (1996)                 |
| Mt. Sonnblick, Austria   |                   |                   |                  |                 |                 | 2160              | 3120               | 1680               |                   |                  | Kasper-Giebl et al. (1999) <sup>2</sup> |
|                          |                   |                   |                  |                 |                 |                   | 1104               | 1056               | 3480              | 96               | Kasper-Giebl et al. (1999) <sup>1</sup> |
| Hyderabad, India         | 2265              | 877               | 517              | 723             | 109             | 389               | 317                | 160                |                   |                  | Kulshrestha et al. (2009)               |
| Bay of Bengal            | 582               | 5039              | 5282             | 58              | 16085           | 336               | 3591               | 426                |                   |                  | Kulshrestha et al. (2009)               |
| Nepal                    | 1805±1873         | 2580±2277         | 1393±1593        | 2436±2092       | 2582±1870       | 1811±2351         | 2502±2007          | 487±326            |                   |                  | Shrestha et al. (2002)                  |
| Singapore                | 697±376           | 318±201           | 500±180          | 744±590         | 2624±1129       | 1660±1284         | 2134±1671          | 2596±2076          |                   |                  | He and Balasubramanian (2008)           |
| Maldives                 | 470-1200          | 500               | 1000-1100        | 140-220         | 1100-1200       | 530-600           | 930-2000           | 490-580            |                   |                  | Granat et al. (2010)                    |

Table S5: Gas and particle scavenging ratios for nitrate and sulfate derived from multiple linear regression [ $C_{\text{prec}} = \text{constant} + W_{\text{gas}}C_{\text{gas,air}} + W_{\text{part}}C_{\text{part,air}}$ ].  $C_{\text{prec}}$  is the total precipitation concentration of nitrate or sulfate;  $W_{\text{gas}}$  and  $W_{\text{part}}$  are the gas and particle scavenging ratios, respectively;  $C_{\text{gas,air}}$  and  $C_{\text{part,air}}$  are the air concentrations of  $\text{HNO}_3$  or  $\text{SO}_2$  and  $\text{pNO}_3^-$  or  $\text{pSO}_4^{2-}$ , respectively.  $R^2$  is the coefficient of determination and r-part is the partial correlation. ns indicates not significant coefficients ( $p > 0.05$ ).

| Site         | $W_{\text{pNO}_3}$ | $W_{\text{HNO}_3}$ | $R^2$ | r-part $\text{pNO}_3^-$ | r-part $\text{HNO}_3$ |  | $W_{\text{pSO}_4}$ | $W_{\text{SO}_2}$ | $R^2$ | r-part $\text{pSO}_4^{2-}$ | r-part $\text{SO}_2$ |
|--------------|--------------------|--------------------|-------|-------------------------|-----------------------|--|--------------------|-------------------|-------|----------------------------|----------------------|
| Saturna      | 910                | 1175               | 0.20  | 0.22                    | 0.33                  |  | 903                | 45                | 0.14  | 0.31                       | 0.06                 |
| Bratt's Lake | 694                | 1359               | 0.16  | 0.29                    | 0.25                  |  |                    |                   | <0.1  |                            |                      |
| Algoma       | 1121               | 1253               | 0.24  | 0.25                    | 0.28                  |  | 434                | 85                | 0.17  | 0.33                       | 0.08                 |
| Longwoods    | 544                | 776                | 0.14  | 0.28                    | 0.21                  |  | 393                | ns                | 0.12  | 0.33                       | -0.01                |
| Egbert       | 523                | 722                | 0.18  | 0.30                    | 0.20                  |  | 391                | ns                | 0.16  | 0.37                       | 0.01                 |
| Sprucedale   | 882                | 1308               | 0.21  | 0.21                    | 0.26                  |  | 505                | ns                | 0.13  | 0.35                       | -0.02                |
| Chalk River  | 786                | 1510               | 0.17  | 0.15                    | 0.28                  |  | 487                | ns                | 0.14  | 0.36                       | -0.01                |
| Chapais      | 1776               | 2848               | 0.25  | 0.16                    | 0.39                  |  | 623                | 409               | 0.20  | 0.41                       | -0.04                |
| Sutton       | 944                | 1241               | 0.15  | 0.19                    | 0.25                  |  | 535                | 31                | 0.17  | 0.39                       | 0.03                 |
| Lac Edouard  | 1532               | 1289               | 0.33  | 0.25                    | 0.22                  |  | 482                | 80                | 0.19  | 0.37                       | 0.06                 |
| Frelighsburg | 958                | 1470               | 0.26  | 0.28                    | 0.29                  |  | 526                | 104               | 0.13  | 0.32                       | 0.08                 |
| Montmorency  | 1470               | 1493               | 0.34  | 0.16                    | 0.45                  |  | 481                | ns                | 0.22  | 0.46                       | -0.03                |
| Kejimikujik  | 1561               | 2382               | 0.19  | 0.22                    | 0.33                  |  |                    |                   | <0.1  |                            |                      |
| Overall      | 570                | 1253               | 0.21  | 0.22                    | 0.29                  |  | 489                | 32                | 0.20  | 0.38                       | 0.04                 |

Table S6: Monthly gas and particle scavenging ratios for nitrate and sulfate derived from multiple linear regression (similar to Table S5)

| Month | $W_{\text{pNO}_3}$ | $W_{\text{HNO}_3}$ | $R^2$ | r-part $\text{pNO}_3^-$ | r-part $\text{HNO}_3$ |  | $W_{\text{pSO}_4}$ | $W_{\text{SO}_2}$ | $R^2$ | r-part $\text{pSO}_4^{2-}$ | r-part $\text{SO}_2$ |
|-------|--------------------|--------------------|-------|-------------------------|-----------------------|--|--------------------|-------------------|-------|----------------------------|----------------------|
| Jan   | 425                | 1871               | 0.23  | 0.16                    | 0.37                  |  | 851                | ns                | 0.25  | 0.40                       | -0.06                |
| Feb   | 548                | 1511               | 0.27  | 0.24                    | 0.35                  |  | 467                | 184               | 0.20  | 0.34                       | 0.00                 |
| Mar   | 583                | 1283               | 0.26  | 0.26                    | 0.31                  |  | 633                | ns                | 0.18  | 0.32                       | 0.02                 |
| Apr   | 442                | 1518               | 0.21  | 0.18                    | 0.30                  |  | 525                | 195               | 0.22  | 0.28                       | 0.09                 |
| May   | 270                | 1332               | 0.18  | 0.10                    | 0.31                  |  | 434                | 257               | 0.19  | 0.22                       | 0.13                 |
| Jun   | 373                | 1093               | 0.22  | 0.11                    | 0.31                  |  | 284                | 307               | 0.22  | 0.22                       | 0.17                 |
| Jul   | 636                | 1005               | 0.19  | 0.13                    | 0.29                  |  | 317                | 204               | 0.21  | 0.26                       | 0.09                 |
| Aug   | 894                | 1065               | 0.24  | 0.17                    | 0.30                  |  | 333                | 230               | 0.20  | 0.26                       | 0.09                 |
| Sep   | 345                | 842                | 0.11  | 0.08                    | 0.20                  |  | 362                | 77                | 0.17  | 0.29                       | 0.05                 |
| Oct   | 749                | 862                | 0.17  | 0.24                    | 0.19                  |  | 472                | 107               | 0.24  | 0.28                       | 0.11                 |
| Nov   | 712                | 1543               | 0.20  | 0.28                    | 0.24                  |  | 780                | 21                | 0.21  | 0.35                       | 0.03                 |
| Dec   | 554                | 1741               | 0.24  | 0.25                    | 0.33                  |  | 670                | ns                | 0.19  | 0.32                       | 0.00                 |

## References

- Barrie, L. A.: Scavenging ratios, wet deposition, and in-cloud oxidation: An application to the oxides of sulphur and nitrogen, *J. Geophys. Res. Atmospheres*, 90(D3), 5789-5799, 1985.
- Bourcier, L., Masson, O., Laj, P., Chausse, P., Pichon, J. M., Paulat, P., Bertrand, G., and Sellegri, K.: A new method for assessing the aerosol to rain chemical composition relationships, *Atmos. Res.*, 118, 295-303, 2012.
- Cadle, S. H., VandeKopple, R., Mulawa, P. A., and Dasch, J. M.: Ambient concentrations, scavenging ratios, and source regions of acid related compounds and trace metals during winter in northern Michigan, *Atmos. Environ.*, 24(12), 2981-2989, 1990.
- Cheng, I., Zhang, L., and Mao H.: Relative contributions of gaseous oxidized mercury and fine and coarse particle-bound mercury to mercury wet deposition at nine monitoring sites in North America, *J. Geophys. Res. Atmospheres*, 120(16), 8549-8562, 2015.
- Encinas, D., Calzada, I., and Casado, H.: Scavenging ratios in an urban area in the Spanish Basque country, *Aerosol Sci. Technol.*, 38(7), 685-691, 2004.
- Galloway, J. N., Savoie, D. L., Keene, W. C., and Prospero, J. M.: The temporal and spatial variability of scavenging ratios for NSS sulfate, nitrate, methanesulfonate and sodium in the atmosphere over the North Atlantic Ocean, *Atmos. Environ.*, 27(2), 235-250, 1993.
- Granat, L., Engström, J. E., Praveen, S., and Rodhe, H.: Light absorbing material (soot) in rainwater and in aerosol particles in the Maldives, *J. Geophys. Res. Atmospheres*, 115(D16307), doi:10.1029/2009JD013768, 2010.
- Guerzoni, S., Cristini, A., Caboi, R., Le Bolloch, O., Marras, I., and Rundeddu, L.: Ionic composition of rainwater and atmospheric aerosols in Sardinia, southern Mediterranean, *Water Air Soil Pollut.*, 85(4), 2077-2082, 1995.
- He, J., and Balasubramanian, R.: Rain-aerosol coupling in the tropical atmosphere of Southeast Asia: distribution and scavenging ratios of major ionic species, *J. Atmos. Chem.*, 60(3), 205-220, 2008.
- Hicks, B. B.: A climatology of wet deposition scavenging ratios for the United States, *Atmos. Environ.*, 39(9), 1585-1596, 2005.
- Kasper-Giebl, A., Kalina, M. F., and Puxbaum, H.: Scavenging ratios for sulfate, ammonium and nitrate determined at Mt. Sonnblick (3106 m.a.s.l.), *Atmos. Environ.*, 33(6), 895-906, 1999.
- Kulshrestha, U. C., Reddy, L. A. K., Satyanarayana, J., and Kulshrestha, M. J.: Real-time wet scavenging of major chemical constituents of aerosols and role of rain intensity in Indian region, *Atmos. Environ.*, 43(32), 5123-5127, 2009.

Shrestha, A. B., Wake, C. P., Dibb, J. E., and Whitlow, S. I.: Aerosol and precipitation chemistry at a remote Himalayan site in Nepal, *Aerosol Sci. Technol.*, 36(4), 441-456, 2002.

Sutton, M. A., Reis, S., Riddick, S. N., Dragosits, U., Nemitz, E., Theobald, M. R., Tang, Y. S., Braban, C. F., Vieno, M., Dore, A. J., Mitchell, R. F., Wanless, S., Daunt, F., Fowler, D., Blackall, T. D., Milford, C., Flechard, C. R., Loubet, B., Massad, R., Cellier, P., Personne, E., Coheur, P. F., Clarisse, L., Van Damme, M., Ngadi, Y., Clerbaux, C., Skjøth, C. A., Geels, C., Hertel, O., Wichink Kruit, R. J., Pinder, R. W., Bash, J. O., Walker, J. T., Simpson, D., Horváth, L., Misselbrook, T. H., Bleeker, A., Dentener, F., and de Vries, W.: Towards a climate-dependent paradigm of ammonia emission and deposition. *Philosophical Transactions of the Royal Society B: Biological Sciences*, 368(1621), doi: 10.1098/rstb.2013.0166, 2013.

Tuncel, S. G. and Ungör, S.: Rain water chemistry in Ankara, Turkey, *Atmos. Environ.*, 30(15), 2721-2727, 1996.

Yao, X., Chan, C. K., Fang, M., Cadle, S., Chan, T., Mulawa, P., He, K., and Ye, B.: The water-soluble ionic composition of PM<sub>2.5</sub> in Shanghai and Beijing, China, *Atmos. Environ.*, 36(26), 4223-4234, 2002.

Yao, X. and Zhang, L.: Trends in atmospheric ammonia at urban, rural, and remote sites across North America, *Atmos. Chem. Phys.*, 16, 11465-11475, doi:10.5194/acp-16-11465-2016, 2016.
